# Supplementary material for: Effectiveness of Abdominal Ultrasonography for Improving the Prognosis of Pancreatic Cancer during Medical Checkup: A Single Center Retrospective Analysis
Source: Preprints.org preprint supplement (doi:10.20944/preprints202209.0242.v1), 2022-09-16
Supplement: Supplementary file 1 [file supplementary]

Supplementary Table 1. Patients with PC diagnosed based on other approaches (group 8)

|                                                     |   |
|-----------------------------------------------------|---|
| CT for abnormal serum level of liver enzyme         | 1 |
| CT in medical checkup                               | 2 |
| Abdominal ultrasonography for abnormal liver enzyme | 4 |
| High serum level of CEA                             | 2 |
| EGD for anemia                                      | 1 |
| EGD in medical checkup                              | 1 |

CT: computed tomography, CEA: carcinoembryonic antigen, EGD :  
esophagogastroduodenoscopy

Supplementary Table 2. Details of patients in group 7

|   | Age | M/F | PS | Place where PC was found | Comorb-<br>idities | Specialty of clinic doctor | Subspecialty of clinic doctor | Tumor location | Tumor size (cm) | Ultrasonographic findings |                |                  |                | PDAC / IPMN derived carcinoma | Stage of cancer | Thera-<br>py | Prognosis                  |
|---|-----|-----|----|--------------------------|--------------------|----------------------------|-------------------------------|----------------|-----------------|---------------------------|----------------|------------------|----------------|-------------------------------|-----------------|--------------|----------------------------|
|   |     |     |    |                          | DM, HT, HL         |                            |                               |                |                 | Tumor in pancreas         | MPD dilatation | Cyst in pancreas | Tumor in liver |                               |                 |              |                            |
| 1 | 67  | F   | 0  | Medical checkup center   | none               |                            |                               | body           | 20              | ●                         |                |                  |                | PDAC                          | 1               | Ope          | Died after 1764 days       |
| 2 | 70  | F   | 0  | Clinic                   | none               | Internal medicine          | Gastro-enterology             | body           | 20              | ●                         |                |                  |                | PDAC                          | 2a              | Ope          | No relapse after 2690 days |
| 3 | 72  | F   | 0  | Clinic                   | HL                 | Internal medicine          | Unknown                       | groove         | 35              | ●                         |                |                  |                | PDAC                          | 2a              | Ope          | No relapse after 2619 days |
| 4 | 65  | M   | 0  | Medical checkup center   | HL                 |                            |                               | head           | 20              |                           | ●              |                  |                | PDAC                          | 2b              | Ope          | No relapse after 2621 days |
| 5 | 72  | M   | 0  | Referral center          | HT, HL             |                            |                               | body           | 08              | ●                         |                |                  |                | PDAC                          | 2               | Chem         | Died after 633 days        |

|    |    |   |   |                              |        |                      |                         |                |    |   |   |   |   |                               |    |      |                                             |
|----|----|---|---|------------------------------|--------|----------------------|-------------------------|----------------|----|---|---|---|---|-------------------------------|----|------|---------------------------------------------|
| 6  | 59 | M | 0 | Medical<br>checkup<br>center | none   | Internal<br>medicine | Respiratory<br>medicine | tail           | 52 |   |   |   | ● | PDAC                          | 4  | Chem | Died<br>after 294<br>days                   |
| 7  | 69 | M | 0 | Clinic                       | HT     | Internal<br>medicine | Gastro-<br>enterology   | body           | 12 |   | ● |   |   | PDAC                          | 4  | Chem | Died<br>after 362<br>days                   |
| 8  | 80 | F | 0 | Clinic                       | DM, HL | Internal<br>medicine | Gastro-<br>enterology   | uncus          | 30 |   | ● | ● |   | PDAC                          | 4  | Chem | Changed<br>hospital<br>after 172<br>days    |
| 9  | 78 | F | 0 | Clinic                       | DM, HL | Internal<br>medicine | Gastro-<br>enterology   | head ~<br>body | 42 | ● | ● |   |   | PDAC                          | 2b | Ope  | Died<br>after 586<br>days                   |
| 10 | 80 | F | 0 | Clinic                       | HT, HL | Internal<br>medicine | Gastro-<br>enterology   | head ~<br>body | 0  |   | ● |   |   | PDAC                          | 0  | Ope  | Alive with<br>relapse<br>after 1756<br>days |
| 11 | 64 | F | 0 | Clinic                       | HL     | Internal<br>medicine | Gastro-<br>enterology   | body           | 5  |   | ● |   |   | IPMN-<br>derived<br>carcinoma | 0  | Ope  | No relapse<br>after 1195<br>days            |
| 12 | 84 | F | 0 | Clinic                       | HT, HL | Internal<br>medicine | Gastro-<br>enterology   | uncus          | 14 |   | ● |   |   | PDAC                          | 2a | Ope  | No relapse<br>after 992<br>days             |

|    |    |   |   |                 |        |                   |                   |      |    |   |   |  |   |      |    |      |                           |
|----|----|---|---|-----------------|--------|-------------------|-------------------|------|----|---|---|--|---|------|----|------|---------------------------|
| 13 | 84 | F | 0 | Clinic          | none   | Internal medicine | Gastro-enterology | body | 27 |   | ● |  |   | PDAC | 2a | Ope  | No relapse after 834 days |
| 14 | 86 | M | 0 | Clinic          | HT, HL | Internal medicine | Gastro-enterology | tail | 50 |   | ● |  |   | PDAC | 4  | Chem | No relapse after 677 days |
| 15 | 75 | M | 0 | Clinic          | DM, HT | Internal medicine | Gastro-enterology | body | 10 | ● |   |  |   | PDAC | 2b | Ope  | No relapse after 642 days |
| 16 | 78 | M | 0 | Referral center | HT, HL |                   |                   | tail | 44 |   |   |  | ● | PDAC | 4  | Chem | Dead after 134 days       |
| 17 | 75 | M | 0 | Clinic          | HT, HL | Internal medicine | Gastro-enterology | head | 15 |   | ● |  |   | PDAC | 2b | Ope  | No relapse after 539 days |

Group 7 included the patients with pancreatic cancer (PC) who were diagnosed through abdominal ultrasonography during medical checkup of asymptomatic individuals.

M: male, F: female, PS: performance status, DM: diabetes mellitus, HT: hypertension, HL: hyperlipidemia, US: abdominal ultrasonography, ●: present, MPD: main pancreatic duct, PDAC: pancreatic ductal adenocarcinoma, IPMN: intraductal papillary mucinous neoplasm, Ope: operation, Chem: chemotherapy
